# Supplementary material for: Groundwater Environmental Functional Zoning Using GIS and FAHP: A Case Study of an Overexploited Coastal Area in the North China Plain, NCP
Source: Research Square preprint supplement (doi:10.21203/rs.3.rs-6174998/v1), 2025-03-31
Supplement: Supplementary file 1 [file f2f2f08e91c225e69162eda8.docx]

In this study, multiple datasets were utilized to analyze hydrological and environmental factors affecting groundwater resources. The data processing steps are outlined as follows:
 The precipitation data were obtained from the WorldClim v1 BIO dataset (https://developers.google.com/earthengine/datasets/catalog/WORLDCLIM_V1_BIO) provided by Google Earth Engine (GEE). The dataset offers high-resolution climate data, which were extracted and processed using GEE scripts. Monthly and annual precipitation values were computed and spatially interpolated to match the study area's resolution.The topographic data were derived from the Copernicus DEM GLO-30 dataset (https://developers.google.com/earth-engine/datasets/catalog/COPERNICUS_DEM_GLO30) available in GEE. The elevation data were resampled and preprocessed to generate slope, aspect, and flow direction maps.
 The ESA WorldCover v200 dataset (https://developers.google.com/earth-engine/datasets/catalog/ESA_WorldCover_v200) was used to classify land cover types in the study area. The dataset provides 10-meter resolution global land cover information. The classification layers were reprojected and reclassified to align with the hydrological analysis requirements.
 Soil characteristics were extracted from the Harmonized World Soil Database (HWSD), sourced from the FAO GAEZ platform (https://gaez.fao.org/pages/hwsd). Key soil properties, including texture, porosity, and permeability, were analyzed to estimate their influence on groundwater recharge.
 Water quality data and groundwater utilization status were obtained from the report *Study* on the《 Zoning of Groundwater Environmental Functions in Tangshan City》. The data were digitized and integrated into the geospatial framework for spatial analysis. Parameters such as pH and pollutant concentrations were assessed to determine groundwater quality trends.

All spatial datasets were processed using ArcGIS and Google Earth Engine for projection standardization, resampling, and alignment to ensure consistency across different data sources. Statistical analysis and interpolation techniques were applied where necessary to fill data gaps and improve spatial resolution. The processed datasets served as the foundation for further assessment of groundwater resources in the study area.
